# Supplementary material
Source: Research Square preprint supplement (doi:10.21203/rs.3.rs-9201326/v1)
Supplement: Supplementary file 1 [file 2b57f848b30564cf9b5cf66f.pdf]

# Deprescribing Intervention For Children Receiving Polypharmacy (defined as three or more psychotropic medications used at the same time)

For Prescriber  
Use Only

## Careful Evaluation

### Polypharmacy not justified?

- Polypharmacy has not been helpful
- Polypharmacy has been causing side effects
- Re-evaluate child

### Child stable?

- No emergency room visits in prior 3 months
- No hospitalizations in prior 3 months
- No planned major life events (e.g., moving, changing schools)

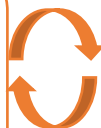

## Initial Health Evaluation

- Conduct a full review of systems, record BMI
- Order labs if needed and not recently done (e.g., if obese, fasting glucose and fasting lipid profile)
- Review medical & psychiatric history

## Safety/Crisis Plan

- To address behavioral escalations or adverse reactions during deprescribing
- Integrate into clinical safety plan
- Provide contact information for local clinic emergency services and 988
- Threat to self or others? Go to closest emergency room

## INITIATE DEPREScribing PROCESS

- Review with caregiver/child reasons the child was put on polypharmacy
- Help caregiver/child understand complexities of behavior, lack of efficacy of current polypharmacy
  - The lowest benefit-harm ratio
  - Lowest likelihood of adverse withdrawal reactions
  - Medications causing side effects
- Discuss severity of risks, safety of deprescribing, benefits of behavioral interventions

## TAPER SLOWLY

- Plan taper process over about 14 weeks
- Reduce 1 medication at a time. Continue other medications as prescribed.
- Reduce dose by 10-25% every 2-4 weeks until discontinuation. If feasible, stay closer to the 10% reduction
- For example, if conducting a 25% taper, reduce dose to 75% of original dose for 4 weeks, then to 50% for 4 weeks, then 25% for 4 weeks, then discontinue

- See the other pages of this guide for some medication-specific examples

For **antidepressants**, (also see additional page):

- Anxiety/depression stable for 1 year
- Higher doses that have been utilized for long periods **OR** Medications with a higher risk of discontinuation need a slow dose reduction 10% every 2-4 weeks.

Risks of discontinuation side effects

- Higher Risk: Paroxetine, Venlafaxine, Duloxetine
- Moderate Risk: Citalopram, Escitalopram, Fluvoxamine, Sertraline, Trazodone
- Low Risk: Bupropion, Fluoxetine

For **antipsychotics**: See antipsychotic specific protocol.

For **stimulants**: One could consider a taper versus discontinuation of stimulant. Monitor for any increase in ADHD symptoms or disruptive behaviors.

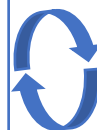

## MONITOR CLOSELY

### Every Two Weeks

- Monitor for **Adverse Drug Withdrawal Events** and **Side Effects**
- Monitor for **Worsening Anxiety, Depression, PTSD, ADHD, OCD, suicidal thoughts, or other mental health symptoms**. Consider utilizing validated symptom scales that are diagnosis specific (e.g. Vanderbilt for ADHD).

### Monthly

- Prescriber office visit with child/family
- Nurse phone check-ins every 4 weeks, between prescriber visits
- Record BMI
- Monitor for **Adverse Drug Withdrawal Events** and **Side Effects**

### End of Taper

- Record BMI
- Repeat any labs conducted at the initial health evaluation to evaluate any changes if indicated

*\*If clinically indicated monitor BP and pulse*

## RESPOND TO EMERGENT ISSUES

### Increase in suicidal thoughts

- Evaluate child, including safety assessment and plan, and consider returning to previous tolerated dose of medication

### Antidepressant Discontinuation Syndrome

- Consider returning to previous tolerated dose of the antidepressant and taper more slowly

### Increase in Irritability, Challenging Behaviors

- Evaluate the behavior and consider boost in behavioral or therapeutic strategies (e.g., caregiver management training, cognitive behavioral therapy, trauma-focused therapy).
- Consider an alternative strategy (e.g., relaxation, exercise, outdoor time, reduction of environmental stimuli, development of activities/hobbies).
- Consider increasing medication back to the prior visit dose, remain at dose for 2-4 weeks, depending on behaviors may potentially try a smaller dose reduction

## Adverse Drug Withdrawal Events are Medication Specific

- Increase in irritability, challenging behaviors, suicidal thoughts or behaviors or other mental health symptoms should be evaluated

### Alpha-2 Agonists:

- Taper slowly to avoid rebound hypertension.

### Antidepressants: Monitor for Antidepressant Discontinuation Syndrome ("FINISH")

- Mild and reversible

Flu like symptom

Insomnia

Nausea

Imbalance

Sensory Symptoms (Paresthesia, Numbness, Electric Shock like

Sensations, Rushing Noise in Head and Visual Trails)

Hyperarousal

### Stimulants:

- Monitor for increase in ADHD symptoms.

### Mood Stabilizers:

- This protocol is not appropriate for patients taking anti-epileptics for seizure disorders. Consult with a neurologist.

## RESOURCES AND OTHER INFORMATION

### Mood Stabilizers

| Common Mood Stabilizers Used with Children, their Oral Forms, Dosage, Recommended & Example Tapers                                                                                                                                                                                                                                                 |           |                               |                                                                                                                     |
|----------------------------------------------------------------------------------------------------------------------------------------------------------------------------------------------------------------------------------------------------------------------------------------------------------------------------------------------------|-----------|-------------------------------|---------------------------------------------------------------------------------------------------------------------|
| Generic Name                                                                                                                                                                                                                                                                                                                                       | Oral Form | Strength                      | Recommended Taper                                                                                                   |
| <i>(Brand Name)</i>                                                                                                                                                                                                                                                                                                                                |           |                               |                                                                                                                     |
| <b>Carbamazepine</b>                                                                                                                                                                                                                                                                                                                               | S         | 100mg/5ml solution            | Taper in 50-100 mg increments. ER formulations taper by 100 mg; T and solution taper by 50 mg.                      |
|                                                                                                                                                                                                                                                                                                                                                    | T         | 100, 200                      |                                                                                                                     |
|                                                                                                                                                                                                                                                                                                                                                    | ER, T     | 100, 200, 400 mg              |                                                                                                                     |
|                                                                                                                                                                                                                                                                                                                                                    | ER, C     | 100, 200, 300 mg              |                                                                                                                     |
| <i>(Tegretol)</i>                                                                                                                                                                                                                                                                                                                                  | T         | 200 mg                        |                                                                                                                     |
| <b>Example taper to reduce by about 10-25% every 2 weeks over 14 weeks:</b> Child taking Carbamazepine 100 mg PO BID. Consider tapering to 50 mg PO QAM and 100 mg PO QHS for 2 weeks, then 50 mg PO BID for 2 weeks, then 50 mg PO QHS for 2 weeks, and then discontinue                                                                          |           |                               |                                                                                                                     |
| <b>Divalproex Sodium</b>                                                                                                                                                                                                                                                                                                                           | DR C      | 125 mg                        | DR Taper in 125-250 mg increments. ER tab taper by 250 mg increments                                                |
|                                                                                                                                                                                                                                                                                                                                                    | DR T      | 125, 250, 500 mg              |                                                                                                                     |
|                                                                                                                                                                                                                                                                                                                                                    | ER T      | 250, 500 mg                   |                                                                                                                     |
| <i>(Depakote)</i>                                                                                                                                                                                                                                                                                                                                  | DR T      | 125, 250, 500 mg              |                                                                                                                     |
| <b>Example taper to reduce by about 10-25% every 2 weeks over 12 weeks:</b> Child taking Divalproex sodium DR 500 PO BID. Consider tapering to 250 mg PO QAM and 500 mg PO QHS for 2 weeks, then 250 mg PO BID for 2 weeks, then 125 mg PO BID for 2 weeks, and then discontinue                                                                   |           |                               |                                                                                                                     |
| <b>Lamotrigine</b>                                                                                                                                                                                                                                                                                                                                 | T         | 25, 100, 150, 200 mg          | Taper in 25-50 mg increments.                                                                                       |
|                                                                                                                                                                                                                                                                                                                                                    | ODT       | 25, 50, 100, 200 mg           |                                                                                                                     |
|                                                                                                                                                                                                                                                                                                                                                    | ER T      | 25, 50, 100, 200, 250, 300 mg |                                                                                                                     |
|                                                                                                                                                                                                                                                                                                                                                    | DT        | 5, 25 mg                      |                                                                                                                     |
| <i>(Lamictal)</i>                                                                                                                                                                                                                                                                                                                                  | T         | 25, 100, 150, 200 mg          |                                                                                                                     |
| <b>Example taper to reduce by about 10-25% every 2 weeks over 14 weeks:</b> Child taking lamotrigine 200 mg PO daily. Consider tapering to 150 mg PO daily for 2 weeks, then 100 mg PO daily for 2 weeks, then 50 mg PO daily for 2 weeks, then 25 mg PO daily for 2 weeks, and then discontinue.                                                  |           |                               |                                                                                                                     |
| <b>Lithium</b>                                                                                                                                                                                                                                                                                                                                     | C         | 150, 300 mg                   | Taper in 150-300 mg increments. Higher doses taper by 300 mg increments and lower doses taper by 150 mg increments. |
|                                                                                                                                                                                                                                                                                                                                                    | T         | 300 mg                        |                                                                                                                     |
|                                                                                                                                                                                                                                                                                                                                                    | ER T      | 300, 450 mg                   |                                                                                                                     |
|                                                                                                                                                                                                                                                                                                                                                    | S         | 8 mEq/5mL                     |                                                                                                                     |
| <i>(Lithobid)</i>                                                                                                                                                                                                                                                                                                                                  | ER T      | 300 mg                        |                                                                                                                     |
| <b>Example taper to reduce by about 10-25% every 2 weeks over 14 weeks:</b> Child taking lithium 600 BID. Consider tapering to 300 mg PO QAM and 600 mg PO QHS for 2 weeks, 300 mg PO BID for 2 weeks, then 150 mg PO QAM and 300 mg PO QHS for 2 weeks, then 150 mg PO BID for 2 weeks, then 150 mg PO QHS for 2 weeks and then discontinue       |           |                               |                                                                                                                     |
| <b>Oxcarbazepine</b>                                                                                                                                                                                                                                                                                                                               | T         | 150, 300, 600 mg              | Taper in 150-300 mg increments. Higher doses taper by 300 mg increments and lower doses taper by 150 mg increments. |
| <i>(Trileptal)</i>                                                                                                                                                                                                                                                                                                                                 | S         | 300 mg/5ml                    |                                                                                                                     |
| <i>(Oxtellar XR)</i>                                                                                                                                                                                                                                                                                                                               | T         | 150, 300, 600 mg              |                                                                                                                     |
| <b>Example taper to reduce by about 10-25% every 2 weeks over 14 weeks:</b> Child taking oxcarbazepine 600 BID. Consider tapering to 300 mg PO QAM and 600 mg PO QHS for 2 weeks, 300 mg PO BID for 2 weeks, then 150 mg PO QAM and 300 mg PO QHS for 2 weeks, then 150 mg PO BID for 2 weeks, then 150 mg PO QHS for 2 weeks and then discontinue |           |                               |                                                                                                                     |
| ODT = Disintegrating tablet, DT= Dispersible T, ER = extended release, S = Solution, T = tablet, C= Capsule                                                                                                                                                                                                                                        |           |                               |                                                                                                                     |

#### Monitor during Taper:

- If child has epilepsy consult with child's neurologist prior to tapering anti-epileptics.
- Monitor for any change in suicidal thinking, challenging behaviors, mood, or sleep difficulties.
- Consider utilizing validated symptom scales that are diagnosis specific (e.g. Vanderbilt for ADHD).

## Antidepressant/Anti-Anxiety Medications

| Common Antidepressants Used with Children, their Oral Forms, Dosage, Recommended & Example Tapers                                                                                                                                                                                                                                                                                                                                                                          |           |                          |                                                                                                                                          |
|----------------------------------------------------------------------------------------------------------------------------------------------------------------------------------------------------------------------------------------------------------------------------------------------------------------------------------------------------------------------------------------------------------------------------------------------------------------------------|-----------|--------------------------|------------------------------------------------------------------------------------------------------------------------------------------|
| Generic Name                                                                                                                                                                                                                                                                                                                                                                                                                                                               | Oral Form | Strength                 | Recommended Taper                                                                                                                        |
| (Brand Name)                                                                                                                                                                                                                                                                                                                                                                                                                                                               |           |                          |                                                                                                                                          |
| <b>Fluoxetine</b>                                                                                                                                                                                                                                                                                                                                                                                                                                                          | S         | 20mg/5ml solution        | Taper in 5-20 mg increments. Higher original dose taper by 20 mg; lower original dose taper by 5-20 mg. Fluoxetine has a long half-life. |
| (Prozac)                                                                                                                                                                                                                                                                                                                                                                                                                                                                   | T, C      | 10, 20, 40, 60 mg        |                                                                                                                                          |
| <b>Example taper to reduce by about 10-25% every 2 weeks over 14 weeks:</b> Child taking Fluoxetine 60 mg PO daily. Consider tapering to 50 mg PO daily for 2 weeks, then 40 mg PO daily for 2 weeks, then 30 mg PO for 2 weeks, then 20 mg PO daily for 2 weeks, and then 10 mg for 2 weeks and then discontinue.                                                                                                                                                         |           |                          |                                                                                                                                          |
| <b>Sertraline</b>                                                                                                                                                                                                                                                                                                                                                                                                                                                          | T         | 20, 25, 50, 100 mg       | Taper in 12.5-50 mg increments. Higher original dose taper by 50 mg; lower original dose taper by 12.5 mg                                |
| (Zoloft)                                                                                                                                                                                                                                                                                                                                                                                                                                                                   |           |                          |                                                                                                                                          |
| <b>Example taper to reduce by 10-25% every 2 weeks over 12 weeks:</b> Child taking sertraline 200 PO QAM. Consider tapering to 150 mg PO QAM for 2 weeks, then 100 mg PO QAM for 2 weeks, then 75 mg mg PO QAM for 2 weeks, then 50 mg for 2 weeks, then 25 mg PO QAM for 2 weeks, then 12.5 mg for 2 weeks, and then discontinue.                                                                                                                                         |           |                          |                                                                                                                                          |
| <b>Citalopram</b>                                                                                                                                                                                                                                                                                                                                                                                                                                                          | S         | 10 mg/5ml solution       | Taper in 5-10 mg increments. Higher original dose taper by 10 mg; lower original dose taper by 5 mg                                      |
| (Celexa)                                                                                                                                                                                                                                                                                                                                                                                                                                                                   | T, C      | 10, 20, 30, 40 mg        |                                                                                                                                          |
| <b>Example taper to reduce by 10-25% every 2 weeks over 14 weeks:</b> Child taking citalopram 40 mg PO daily. Consider tapering to 30 mg PO daily for 2 weeks, then 20 mg PO daily for 2 weeks, then 10 mg PO daily for 2 weeks, then 5 mg PO daily for 2 weeks, and then discontinue.                                                                                                                                                                                     |           |                          |                                                                                                                                          |
| <b>Escitalopram</b>                                                                                                                                                                                                                                                                                                                                                                                                                                                        | T         | 5, 10, 20 mg             | Taper in 2.5-5 mg increments. Higher original dose taper by 5 mg; lower original dose taper by 2.5 mg                                    |
| (Lexapro)                                                                                                                                                                                                                                                                                                                                                                                                                                                                  |           |                          |                                                                                                                                          |
| <b>Example taper to reduce by 10-25% every 2 weeks over 14 weeks:</b> Child taking escitalopram 20 mg PO daily. Consider tapering to 15 mg PO daily for 2 weeks, then 10 mg PO daily for 2 weeks, then 5 mg PO QHS for 2 daily, then 2.5 mg PO daily for 2 weeks, and then discontinue.                                                                                                                                                                                    |           |                          |                                                                                                                                          |
| <b>Fluvoxamine</b>                                                                                                                                                                                                                                                                                                                                                                                                                                                         | T         | 25, 50, 100 mg           | Taper in 25-50 mg increments. Higher original dose taper by 50 mg; lower original dose taper by 25 mg                                    |
| (Luvox)                                                                                                                                                                                                                                                                                                                                                                                                                                                                    | ER        | 100, 150 mg              |                                                                                                                                          |
| <b>Example taper to reduce by 10-25% every 2 weeks over 14 weeks:</b> Child taking fluvoxamine 150 mg PO BID. Consider tapering to 100 mg PO QAM and 150 mg PO QHS for 2 weeks, then 100 mg PO BID for 2 weeks, then 75 mg PO BID for 2 weeks, then 50 mg PO QAM and 75 mg PO QHS for 2 weeks, and then 50 mg PO BID for 2 weeks, then 25 mg PO QAM and 50 mg PO QHS for 2 weeks, and then 25 mg PO BID for 2 weeks and then 25 mg PO QHS for 2 weeks and then discontinue |           |                          |                                                                                                                                          |
| <b>Venlafaxine</b>                                                                                                                                                                                                                                                                                                                                                                                                                                                         | T         | 25, 37.5, 50, 75, 100 mg | Taper in 25-37.5 mg increments. Higher original dose taper by 37.5 mg; lower original dose taper by 25 mg                                |
| (Effexor)                                                                                                                                                                                                                                                                                                                                                                                                                                                                  | ER        | 37.5, 75, 150, 225 mg    |                                                                                                                                          |
| <b>Example taper to reduce by 10-25% every 2 weeks over 14 weeks:</b> Child taking Venlafaxine 225 mg PO daily. Consider tapering to 187.5 mg PO daily for 2 weeks, then 150 mg PO Q daily for 2 weeks, then 112.5 mg PO daily for 2 weeks, then 75 mg PO daily for 2 weeks, then 50 mg PO daily for 2 weeks, then 25 mg PO daily for 2 weeks, then 12.5 mg PO daily for 2 weeks and then discontinue.                                                                     |           |                          |                                                                                                                                          |
| <b>Duloxetine</b>                                                                                                                                                                                                                                                                                                                                                                                                                                                          | DR        | 20, 30, 40, 60 mg        | Taper in 20-30 mg increments. Higher original dose taper by 30 mg; lower original dose taper by 20 mg                                    |
| (Cymbalta)                                                                                                                                                                                                                                                                                                                                                                                                                                                                 | C         |                          |                                                                                                                                          |
| <b>Example taper to reduce by 10-25% every 2 weeks over 14 weeks:</b> Child taking Duloxetine 120 mg PO daily. Consider tapering to 90 mg PO daily for 2-4 weeks, then 60 mg PO Q daily for 2-4 weeks, then 20 mg PO daily for 2-4 weeks, and then discontinue.                                                                                                                                                                                                            |           |                          |                                                                                                                                          |
| <b>Buspirone</b>                                                                                                                                                                                                                                                                                                                                                                                                                                                           | T         | 5, 7.5, 10, 15, 30 mg    | Taper in 5-15 mg increments. Higher original dose taper by 15 mg; lower original dose taper by 5 mg                                      |
| (Buspar)                                                                                                                                                                                                                                                                                                                                                                                                                                                                   |           |                          |                                                                                                                                          |
| <b>Example taper to reduce by 10-25% every 2 weeks over 14 weeks:</b> Child taking Buspirone 30 mg PO BID. Consider tapering to 15 mg PO QAM and 30 mg PO QPM for 2 weeks, then 15 mg PO BID for 2 weeks, then 7.5 mg PO QAM and 15 mg PO QPM for 2 weeks, then 7.5 mg PO BID for 2 weeks, and then 7.5 mg PO daily for 2 weeks and then discontinue                                                                                                                       |           |                          |                                                                                                                                          |

ODT = Disintegrating tablet, DT= Dispersible T, ER = extended release, S = Solution, T = tablet, C= Capsule

### Monitor during Taper:

- Taper slowly to avoid antidepressant discontinuation syndrome (“FINISH”; see figure on first page).
- Monitor for any change in challenging behaviors, suicidal thoughts, depression, anxiety, OCD, PTSD, or other mental health symptoms.
- Consider utilizing validated symptom scales that are diagnosis specific (e.g. PHQ-9 for depression).

## Alpha 2-Agonists

| Common Alpha 2-Agonists Used with Children, their Oral Forms, Dosage, Recommended & Example Tapers                                                                                                                                               |           |               |                                                                                                                               |
|--------------------------------------------------------------------------------------------------------------------------------------------------------------------------------------------------------------------------------------------------|-----------|---------------|-------------------------------------------------------------------------------------------------------------------------------|
| Generic Name                                                                                                                                                                                                                                     | Oral Form | Strength      | Recommended Taper                                                                                                             |
| (Brand Name)                                                                                                                                                                                                                                     |           |               |                                                                                                                               |
| <b>Clonidine</b>                                                                                                                                                                                                                                 | T         | 0.1, 0.2 mg   | Taper in 0.05-0.1 mg increments. Can consider a taper more quickly by tapering every week instead of every 2 weeks if needed. |
| Clonidine ER ( <i>Kapvay</i> )                                                                                                                                                                                                                   | T         | 0.1 mg        | Taper in 0.1 mg increments. Can consider a taper more quickly by tapering every week instead of every 2 weeks if needed.      |
| <b>Example taper to reduce by about 10-25% every 2 weeks:</b> Child taking Clonidine 0.2 mg PO QHS. Consider tapering to 0.15 mg PO QHS for 2 weeks, then 0.1 mg PO QHS for 2 weeks, then 0.05 mg PO for QHS weeks and then discontinue.         |           |               |                                                                                                                               |
| Guanfacine                                                                                                                                                                                                                                       | T         | 1, 2 mg       | Taper in 0.5-1 mg increments. Can consider a taper more quickly by tapering every week instead of every 2 weeks if needed.    |
| Guanfacine ER ( <i>Intuniv</i> )                                                                                                                                                                                                                 | T         | 1, 2, 3, 4 mg | Taper in 1 mg increments. Can consider a taper more quickly by tapering every week instead of every 2 weeks if needed.        |
| <b>Example taper to reduce by about 10-25% every 2 weeks:</b> Child taking Guanfacine ER 4 mg PO daily. Consider tapering to 3 mg PO daily for 2 weeks, then 2 mg PO daily for 2 weeks, then 1 mg PO for daily for 2 weeks and then discontinue. |           |               |                                                                                                                               |
| ODT = Disintegrating tablet, DT= Dispersible T, ER = extended release, S = Solution, T = tablet, C= Capsule                                                                                                                                      |           |               |                                                                                                                               |

### Monitor during Taper:

- Taper slowly to avoid rebound hypertension
- Monitor for any change in ADHD symptoms, challenging behaviors or sleep difficulties.
- Consider utilizing validated symptom scales that are diagnosis specific (e.g. Vanderbilt for ADHD).

## Stimulants

For stimulants: One could consider a taper versus discontinuation of stimulant. Monitor for any increase in ADHD symptoms or disruptive behaviors.

### Monitor during Taper:

- Taper slowly to avoid rebound hypertension
- Monitor for any change in ADHD symptoms, challenging behaviors or sleep difficulties.
- Consider utilizing validated symptom scales that are diagnosis specific (e.g. Vanderbilt for ADHD).

## References

1. Scott, I. A. et al. Reducing inappropriate polypharmacy: the process of deprescribing. *JAMA Intern. Med.* 175, 827–834 (2015).
2. Haddad, P. M., & Anderson, I. M. (2007). Recognising and managing antidepressant discontinuation symptoms. *Advances in Psychiatric treatment*, 13(6), 447-457.
3. Warner, C. H., Bobo, W., Warner, C., Reid, S., & Rachal, J. (2006). Antidepressant discontinuation syndrome. *American Family Physician*, 74(3), 449-456.
