# Supplementary material
Source: Research Square preprint supplement (doi:10.21203/rs.3.rs-9201326/v1)
Supplement: Supplementary file 2 [file 50182f01a0a863f06619a583.pdf]

## Medication Reactions Checklist

Please check any symptoms, side effects, withdrawal symptoms your child has experienced over the past 2 weeks that you believe are related to the medications. (Select all that apply)

### Eyes, Ears, Nose, & Throat

- Dry mouth/nose/eyes/skin
- Sore throat
- Blurred vision

### Heart

- Fast heart rate / heart palpitations

### General

- Change in appetite (increase or decrease)
- Drowsy/tired
- Flu Like Symptoms including tiredness, achy muscles or chills, headache
- Trouble sleeping
- Swelling
- Weight change (gain or loss)
- Dry mouth/nose/eyes/skin
- Sore throat

### Hormones

- Acne
- Some sensory symptoms (paresthesia, numbness, electric shock like sensations, rushing noise in head and visual trails)
- Excessive sweating
- Feeling cold
- Thirsty
- Blurred vision

### Stomach

- Stomach pain
- Constipation
- Diarrhea
- Heart burn

### Urinary

- Bedwetting
- Trouble urinating (e.g., burning, frequent urges)
- Urine dark or feces pale

### Hair & Skin

- Bruises easily
- Hair loss
- Itchy skin, skin rash/hives

### Muscles & Bones

- Muscle stiffness
- Muscle tightening that child can't control

### Brain/Neurology

- Abnormal eye movements
- Clumsy/unsteady
- Confusion
- Dizziness
- Drooling
- Hallucinations
- Headache
- Seizures
- Tics, twitching
- Tingling in fingers or toes
- Tremors/ slowed movements

### Thoughts & Feelings

- Agitation/irritability
- Increase in inattention, hyperactivity or impulsivity
- Feeling depressed
- Elated, abnormally happy, on a "high"
- Focusing problems
- Increase in inattention, hyperactivity or impulsivity
- Increase in irritability, aggression or suicidal thinking
- Mood swings
- Nervousness
- Worsening mental health symptoms
- Some of the following symptoms together: achy muscles or chills, difficulty sleeping, nausea, electric shock like sensations, dizziness

The issues below could indicate a serious medical problem. If you check any of them, please contact your prescriber as soon as possible.

- Some of the following symptoms together: extreme stiffness, high fever, confusion, abnormal pulse and eye pain
- Some of the following symptoms together: fever, sore throat, yellowing skin and easy bruising
- Jaundice (yellow skin or eyes)
- Mouth ulcers
- Seizure
- Slurred speech
- Stiffness of tongue
- Sudden stiffness and unable to breathe or swallow
- Suicidal thoughts
- Some of the following symptoms together: confusion, sweating, seizure, agitation, diarrhea, tremors, chest pain
